# Supplementary material for: The suppressive role of calcium sensing receptor in endometrial cancer
Source: PubMed Central journal article supplement (PMC5773571; doi:10.1038/s41598-018-19286-1), 2018-01-18
Supplement: 41598_2018_19286_MOESM1_ESM.pdf [file 41598_2018_19286_MOESM1_ESM.pdf]

## **Supplementary information**

### **Title: The suppressive role of calcium sensing receptor in endometrial cancer**

Xiaoyan Xin<sup>1</sup> ¶, Xianqin Zeng<sup>2</sup> ¶, Dilu Feng<sup>1</sup>, Teng Hua<sup>1</sup>, Shuangge Liu<sup>1</sup>, Shuqi Chi<sup>1</sup>, Qinghua Hu<sup>2\*</sup>, Hongbo Wang<sup>1\*</sup>

1. Department of Gynecology and Obstetrics, Union Hospital, Tongji Medical College, Huazhong University of Science and Technology, No.1277, Jiefang Avenue, Jiangan District, Wuhan PR China, 430022.

2. Department of Pathophysiology, School of Basic Medicine, Tongji Medical College, Huazhong University of Science and Technology, No.13, Hangkong Road, Qiaokou District, Wuhan PR China, 430030.

¶ ¶: Xianqin Zeng and Xiaoyan Xin contributed equally to this work.

#### **\*Corresponding author:**

Professor Hongbo Wang, Department of Gynecology and Obstetrics, Union Hospital, Tongji Medical College, Huazhong University of Science and Technology, No.1277, Jiefang Avenue, Jiangan District, Wuhan PR China. Tel: +86-02785726301; Fax: +86-02785726301; E-mail: hb\_wang1969@sina.com.

Professor Qinghua Hu, Department of Pathophysiology, School of Basic Medicine, Tongji Medical College, Huazhong University of Science and Technology, No.13, Hangkong Road, Qiaokou District, Wuhan PR China, 430030. E-mail: qinghuaa@mails.tjmu.edu.cn.

## Supplemental Table S1

**Table 1** Clinicopathological characteristics and CaSR expression in patients with endometrial cancer

| Parameters          | CaSR expression |               | <i>p</i> value |
|---------------------|-----------------|---------------|----------------|
|                     | (n=50)          | average score |                |
| Age                 |                 |               |                |
| <50                 | 14              | 7.857         | 0.1813         |
| ≥50                 | 36              | 7.672         |                |
| FIGO stage          |                 |               |                |
| I/II                | 39              | 8.056         | 0.0774         |
| III/IV              | 11              | 6.545         |                |
| Histologic grade    |                 |               |                |
| G1                  | 26              | 8.508         | <b>0.0272</b>  |
| G2/G3               | 24              | 6.875         |                |
| Myometrial invasion |                 |               |                |
| <1/2 of myometrium  | 34              | 8.212         | <b>0.0482</b>  |
| ≥1/2 of myometrium  | 16              | 6.688         |                |
| LN metastasis       |                 |               |                |
| Absent              | 44              | 8.073         | <b>0.0077</b>  |
| Present             | 6               | 5.167         |                |

*FIGO* International Federation of Gynecology and Obstetrics

## Supplemental Figure S1

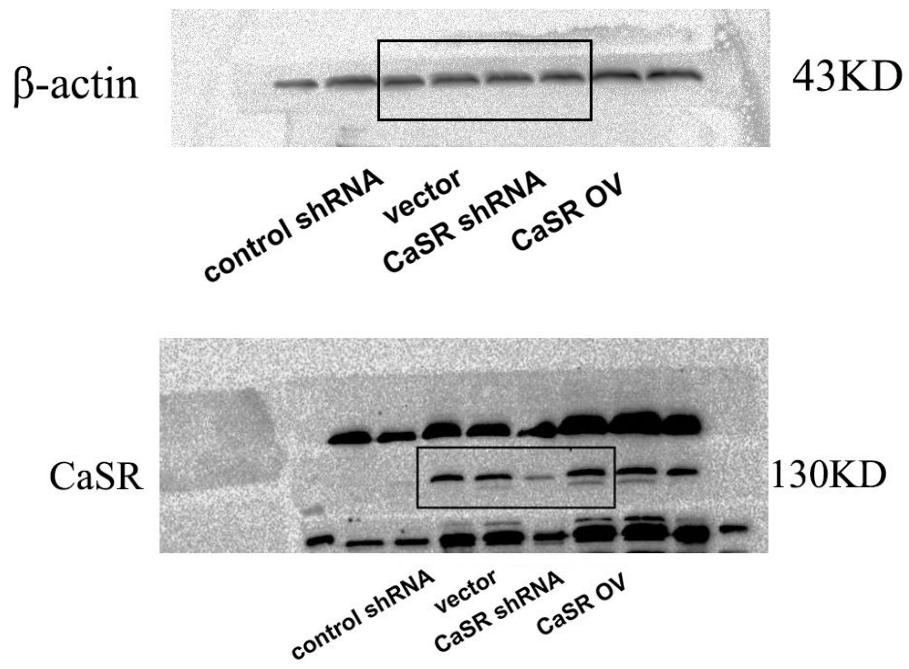

Supplementary Figure S1. Full length blots of Figure 1A. black dotted lines show the cropping locations.

Supplemental Figure S2

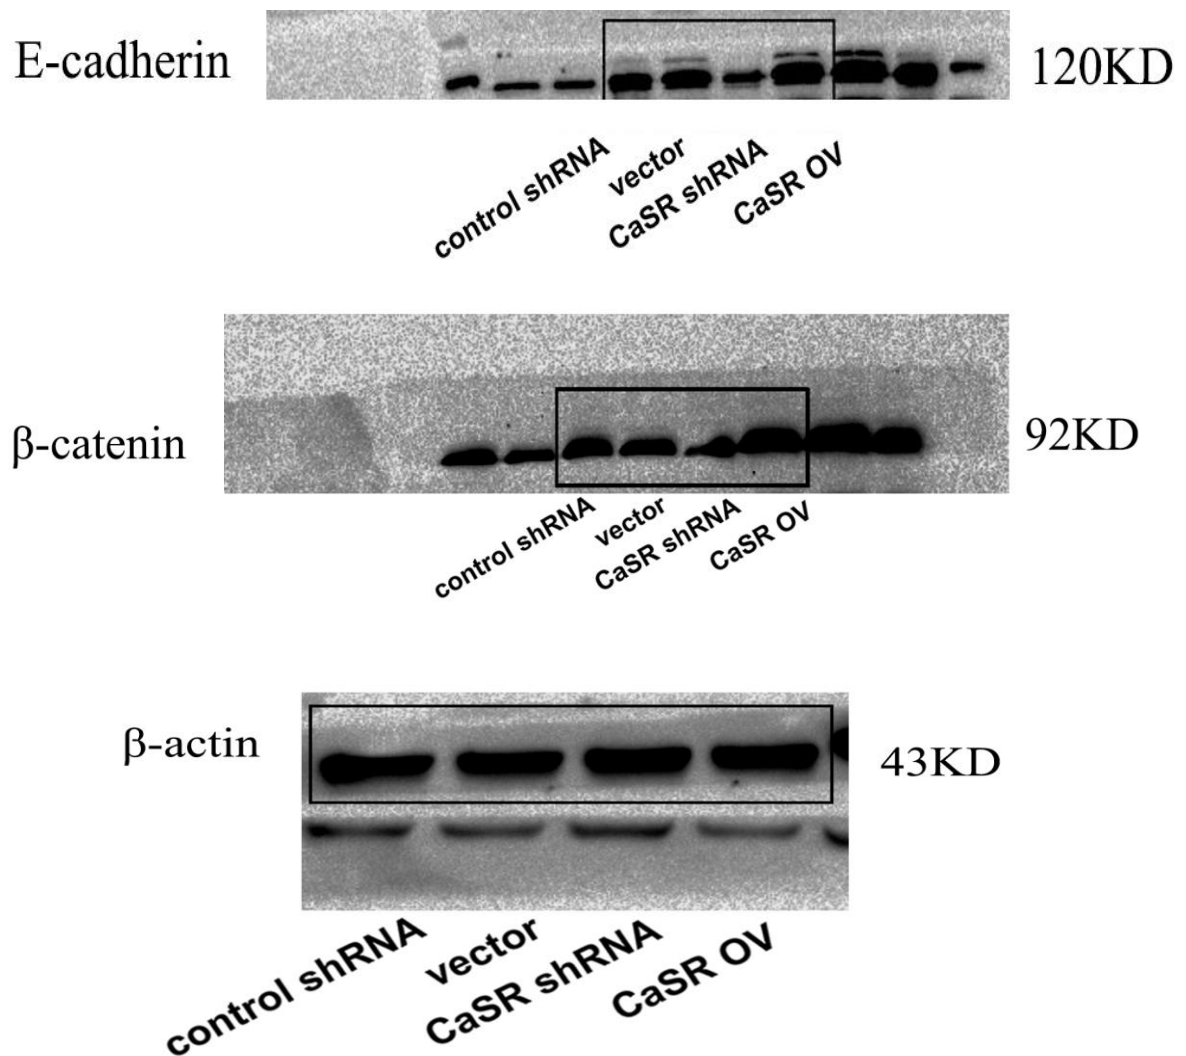

Supplementary Figure S2. Full length blots of Figure 3C. black dotted lines show the cropping locations.

### Supplemental Figure S3

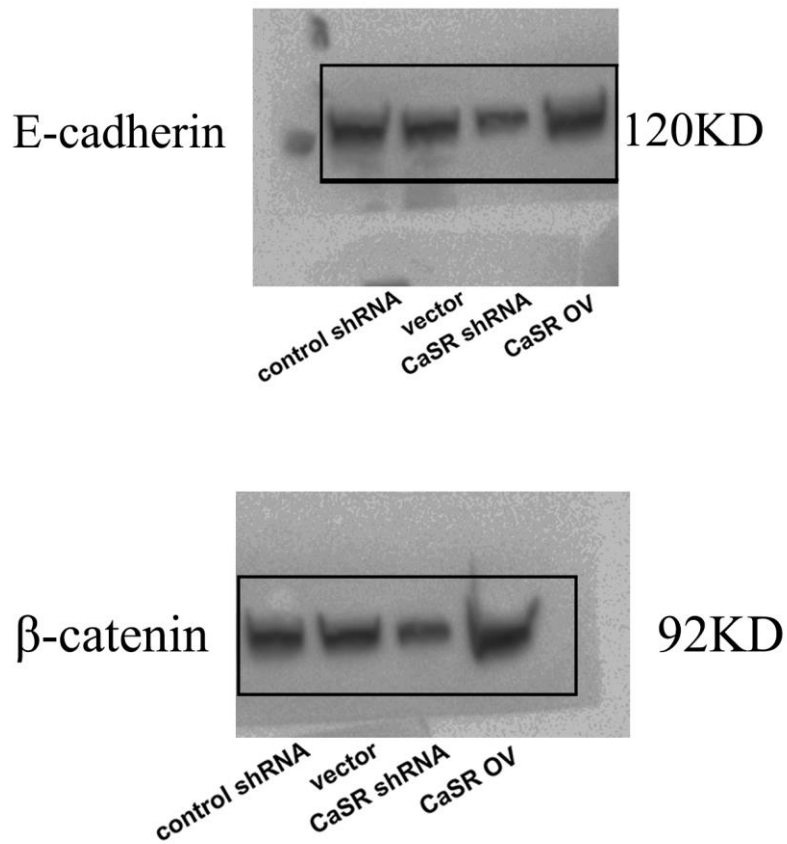

Supplementary Figure S3. Full length blots of Figure 3F. black dotted lines show the cropping locations.

## Supplemental Figure S4

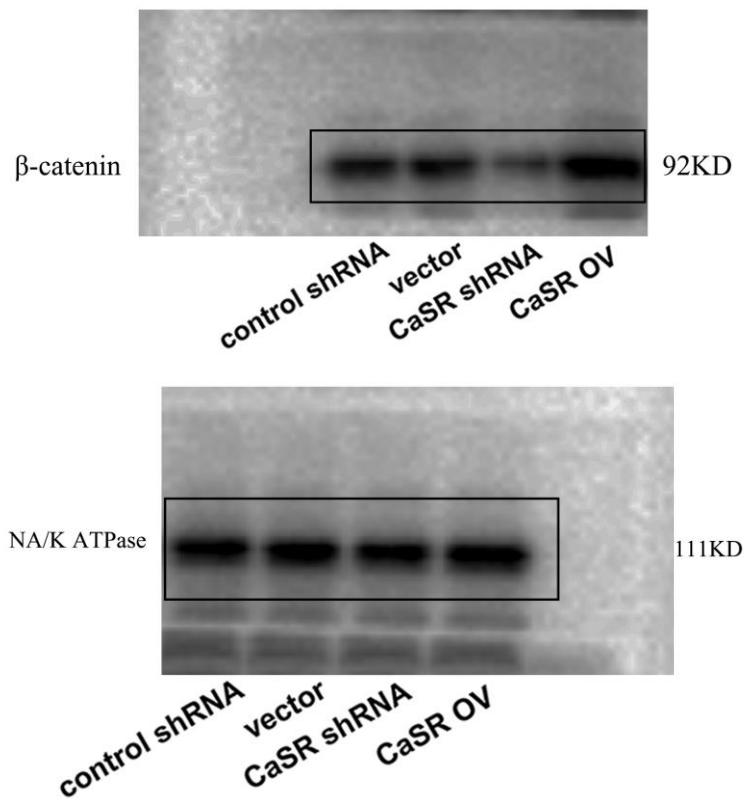

Supplementary Figure S4. Full length blots of Figure 4F. black dotted lines show the cropping locations.

## Supplemental Figure S5

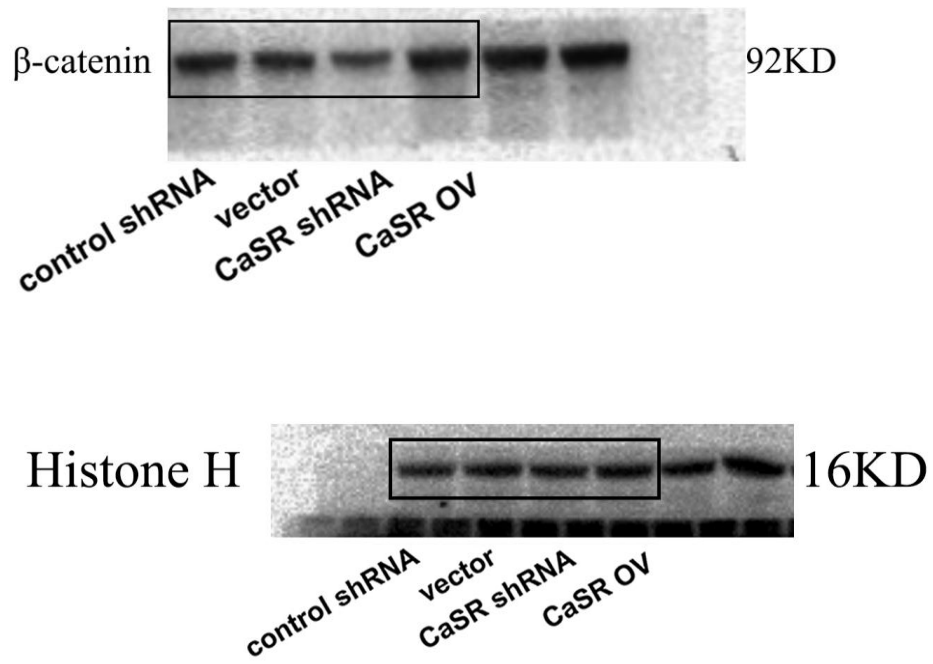

Supplementary Figure S5. Full length blots of Figure 4G. black dotted lines show the cropping locations.

## Supplemental Figure S6

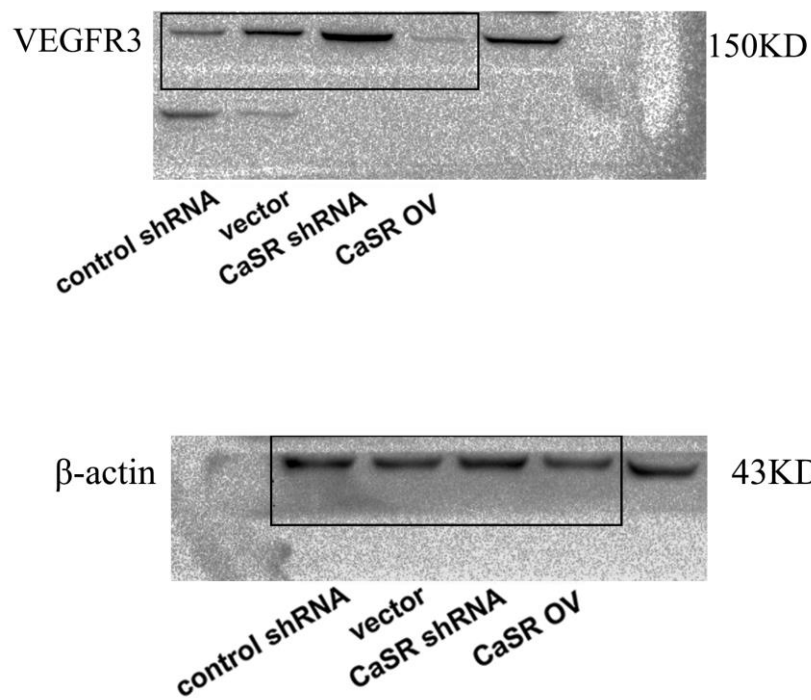

Supplementary Figure S6. Full length blots of Figure 6A. black dotted lines show the cropping locations.
